# Supplementary material for: Trans-species polymorphism at antimicrobial innate immunity cathelicidin genes of Atlantic cod and related species
Source: PeerJ journal article supplement (doi:10.7717/peerj.976), 2015-05-21
Supplement: FigS1.pdf [file FigS1.pdf]

Exon 1

Exon 2

|                   |                  |                        |                    |             |                       |                  |    |
|-------------------|------------------|------------------------|--------------------|-------------|-----------------------|------------------|----|
|                   | 4<br>3<br>2<br>1 | MTTQMRLLCFAAVTLLAEAQMI | PPFIFPLKNFRPLLDQLR | VEIVYPEGVDL | STMSVRKMTFPAQELDCSQVN | 4<br>3<br>2<br>1 |    |
| 105746'1.Gmo.Gre  |                  | MTTQMRLLCFAAVTLLAEAQMI | PPFIFPLKNFRPLLDQLR | DEIVYPEGVDL | STMSVRKMTFPAQELDCSQVN |                  | 73 |
| 103852'2.Gog.Gre  |                  | MTTQMRLLCFAAVTLLAEAQMI | PPFIFPLKNFRPLLDQLR | DEIVYPEGVDL | STMSVRKMTFPAQELDCSQVN |                  | 73 |
| 152074'1.Gma.Pac  |                  | MTTQMRLLCFAAVTLLAEAQMI | PPFIFPLKNFRPLLDQLR | DEIVYPEGVDL | STMSVRKMTFPAQELDCSQVN |                  | 73 |
| 152050'1.Gma.Pac  |                  | MTTQMRLLCFAAVTLLAEAQMI | PPFIFPLKNFRPLLDQLR | DEIVYPEGVDL | STMSVRKMTFPAQELDCSQVN |                  | 73 |
| 152027'3.Gch.Pac  |                  | MTTQMRLLCFAAVTLLAEAQMI | PPFIFPLKNFRPLLDQLR | DEIVYPEGVDL | STMSVRKMTFPAQELDCSQVN |                  | 73 |
| 118507'6.Gmo.Ice  |                  | MTTQMRLLCFAAVTLLAEAQMI | PPFIFPLKNFRPLLDQLR | DEIVYPEGVDL | STMSVRKMTFPAQELDCSQVN |                  | 73 |
| 140272'9.Gmo.Bar  |                  | MTTQMRLLCFAAVTLLAEAQMI | PPFIFPLKNFRPLLDQLR | DEIVYPEGVDL | STMSVRKMTFPAQELDCSQVN |                  | 73 |
| 140179'3.Gmo.Cel  |                  | MTTQMRLLCFAAVTLLAEAQMI | PPFIFPLKNFRPLLDQLR | DEIVYPEGVDL | STMSVRKMTFPAQELDCSQVN |                  | 73 |
| 140254'2.Gmo.Bar  |                  | MTTQMRLLCFAAVTLLAEAQMI | PPFIFPLKNFRPLLDQLR | DEIVYPEGVDL | STMSVRKMTFPAQELDCSQVN |                  | 73 |
| 140179'1.Gmo.Cel  |                  | MTTQMRLLCFAAVTLLAEAQMI | PPFIFPLKNFRPLLDQLR | DEIVYPEGVDL | STMSVRKMTFPAQELDCSQVN |                  | 73 |
| 152018'3.Gch.Pac  |                  | MTTQMRLLCFAAVTLLAEAQMI | PPFIFPLKNFRPLLDQLR | DEIVYPEGVDL | STMSVRKMTFPAQELDCSQVN |                  | 73 |
| 140272'8.Gmo.Bar  |                  | MTTQMRLLCFAAVTLLAEAQMI | PPFIFPLKNFRPLLDQLR | DEIVYPEGVDL | STMSVRKMTFPAQELDCSQVN |                  | 73 |
| 140272'1.Gmo.Bar  |                  | MTTQMRLLCFAAVTLLAEAQMI | PPFIFPLKNFRPLLDQLR | DEIVYPEGVDL | STMSVRKMTFPAQELDCSQVN |                  | 73 |
| 118507'12.Gmo.Ice |                  | MTTQMRLLCFAAVTLLAEAQMI | PPFIFPLKNFRPLLDQLR | DEIVYPEGVDL | STMSVRKMTFPAQELDCSQVN |                  | 73 |
| 152027'2.Gch.Pac  |                  | MTTQMRLLCFAAVTLLAEAQMI | PPFIFPLKNFRPLLDQLR | DEIVYPEGVDL | STMSVRKMTFPAQELDCSQVN |                  | 73 |
| 104931'3.Gmo.Gre  |                  | MTTQMRLLCFAAVTLLAEAQMI | PPFIFPLKNFRPLLDQLR | DEIVYPEGVDL | STMSVRKMTFPAQELDCSQVN |                  | 73 |
| ES786338.1'cath2  |                  | MTTQMRLLCFAAVTLLAEAQMI | PPFIFPLKNFRPLLDQLR | DEIVYPEGVDL | STMSVRKMTFPAQELDCSQVN |                  | 73 |
| 103659'2.Bsa.Gre  |                  | MTTQMRLLCFAAVTLLAEAQMI | PPFIFPLKNFRPLLDQLR | VEIVYPEGVDL | STMSVRKMTFPAQELDCSQVN |                  | 73 |
| 105746'3.Gmo.Gre  |                  | MTTQMRLLCFAAVTLLAEAQMI | PPFIFPLKNFRPLLDQLR | VEIVYPEGVDL | STMSVKKMTFPAQELDCSQVN |                  | 73 |
| 152074'3.Gma.Pac  |                  | MTTQMRLLCFAAVTLLAEAQMI | PPFIFPLKNFRPLLDQLR | VEIVYPEGVDL | STMSVKKMTFPAQELDCSQVN |                  | 73 |
| 104947'2.Gog.Gre  |                  | MTTQMRLLCFAAVTLLAEAQMI | PPFIFPLKNFRPLLDQLR | VEIVYPEGVDL | STMSVKKMTFPAQELDCSQVN |                  | 73 |
| 152050'3.Gma.Pac  |                  | MTTQMRLLCFAAVTLLAEAQMI | PPFIFPLKNFRPLLDQLR | VEIVYPEGVDL | STMSVKKMTFPAQELDCSQVN |                  | 73 |
| 152921'3.Gmo.Nor  |                  | MTTQMRLLCFAAVTLLAEAQMI | PPFIFPLKNFRPLLDQLR | VEIVYPEGVDL | STMSVRKMTFPAQELDCSQVN |                  | 73 |
| FG312333.1'cath1  |                  | MTTQMRLLCFAAVTLLAEAQMI | PPFIFPLKNFRPLLDQLR | VEIVYPEGVDL | STMSVRKMTFPAQELDCSQVN |                  | 73 |
| EY975127'cath1    |                  | MTTQMRLLCFAAVTLLAEAQMI | PPFIFPLKNFRPLLDQLR | VEIVYPEGVDL | STMSVRKMTFPAQELDCSQVN |                  | 73 |
| 152027'1.Gch.Pac  |                  | MTTQMRLLCFAAVTLLAEAQMI | PPFIFPLKNFRPLLDQLR | VEIVYPEGVDL | STMSVRKMTFPAQELDCSQVN |                  | 73 |
| GW862872.1-cath1  |                  | MTTQMRLLCFAAVTLLAEAQMI | PPFIFPLKNFRPLLDQLR | VEIVYPEGVDL | STMSVRKMTFPAQELDCSQVN |                  | 73 |
| 200079'3.Gmo.Can  |                  | MTTQMRLLCFAAVTLLAEAQMI | PPFIFPLKNFRPLLDQLR | VEIVYPEGVDL | STMSVRKMTFPAQELDCSQVN |                  | 73 |
| 117757'1.Gmo.Ice  |                  | MTTQMRLLCFAAVTLLAEAQMI | PPFIFPLKNFRPLLDQLR | VEIVYPEGVDL | STMSVRKMTFPAQELDCSQVN |                  | 73 |
| 104931'1.Gmo.Gre  |                  | MTTQMRLLCFAAVTLLAEAQMI | PPFIFPLKNFRPLLDQLR | VEIVYPEGVDL | STMSVRKMTFPAQELDCSQVN |                  | 73 |
| 118507'7.Gmo.Ice  |                  | MTTQMRLLCFAAVTLLAEAQMI | PPFIFPLKNFRPLLDQLR | VEIVYPEGVDL | STMSVRKMTFPAQELDCSQVN |                  | 73 |
| 200079'1.Gmo.Can  |                  | MTTQMRLLCFAAVTLLAEAQMI | PPFIFPLKNFCPLLDQLR | VEIVYPEGVDL | STMSVRKMTFPAQELDCSQVN |                  | 73 |
| 115574'2.Gmo.Far  |                  | MTTQMRLLCFAAVTLLAEAQMI | PPFIFPLKNFRPLLDQLR | VEIVYPEGVDL | STMSVRKMTFPAQELDCSQVN |                  | 73 |
| 140233'2.Gmo.Bal  |                  | MTTQMRLLCFAAVTLLAEAQMI | PPFIFPLKNFRPLLDQLR | VEIVYPEGVDL | STMSVRKMTFPAQELDCSQVN |                  | 73 |
| 140176'1.Gmo.Cel  |                  | MTTQMRLLCFAAVTLLAEAQMI | PPFIFPLKNFRPLLDQLR | VEIVYPEGVDL | STMSVRKMTFPAQELDCSQVN |                  | 73 |
| 104725'1.Bsa.Gre  |                  | MTTQMRLLCFAAVTLLAEAQMI | PPFIFPLKNFRPLLDQLR | VEIVYPEGVDL | STMSVRKMTFPAQELDCSQVN |                  | 73 |
| 114718'1.Gmo.Far  |                  | MTTQMRLLCFAAVTLLAEAQMI | PPFIFPLKNFRPLLDQLR | VEIVYPEGVDL | STMSVRKMTFPAQELDCSQVN |                  | 73 |
| 152924'3.Gmo.Nor  |                  | MTTQMRLLCFAAVTLLAEAQMI | PPFIFPLKNFRPLLDQLR | VEIVYPEGVDL | STMSVRKMTFPAQELDCSQVN |                  | 73 |
| 114718'4.Gmo.Far  |                  | MTTQMRLLCFAAVTLLAEAQMI | PPFIFPLKNFRPLLDQLR | VEIVYPEGVDL | STMSVRKMTFPAQELDCSQVN |                  | 73 |
| 125968'3.Gmo.Ice  |                  | MTTQMRLLCFAAVTLLAEAQMI | PPFIFPLKNFRPLLDQLR | VEIVYPEGVDL | STMSVRKMTFPAQELDCSQVN |                  | 73 |
| 115574'1.Gmo.Far  |                  | MTTQMRLLCFAAVTLLAEAQMI | PPFIFPLKNFRPLLDQLR | VEIVYPEGVDL | STMSVRKMTFPAQELDCSQVN |                  | 73 |
| 152924'2.Gmo.Nor  |                  | MTTQMRLLCFAAVTLLAEAQMI | PPFIFPLKNFRPLLDQLR | VEIVYPEGVDL | STMSVRKMTFPAQELDCSQVN |                  | 73 |
| 200093'5.Gmo.Can  |                  | MTTQMRLLCFAAVTLLAEAQMI | PPFIFPLKNFRPLLDQLR | VEIVYPEGVDL | STMSVRKMTFPAQELDCSQVN |                  | 73 |
| 117795'1.Gmo.Ice  |                  | MTTQMRLLCFAAVTLLAEAQMI | PPFIFPLKNFRPLLDQLR | VEIVYPEGVDL | STMSVRKMTFPAQELDCSQVN |                  | 73 |
| 118214'2.Gmo.Ice  |                  | MTTQMRLLCFAAVTLLAEAQMI | PPFIFPLKNFRPLLDQLR | VEIVYPEGVDL | STMSVRKMTFPAQELDCSQVN |                  | 73 |
| 140219'3.Gmo.Bal  |                  | MTTQMRLLCFAAVTLLAEAQMI | PPFIFPLKNFRPLLDQLR | VEIVYPEGVDL | STMSVRKMTFPAQELDCSQVN |                  | 73 |
| 200093'3.Gmo.Can  |                  | MTTQMRLLCFAAVTLLAEAQMI | PPFIFPLKNFRPLLDQLR | VEIVYPEGVDL | STMSVRKMTFPAQELDCSQVN |                  | 73 |
| EU707291.1'cath1  |                  | MTTQMRLLCFAAVTLLAEAQMI | PPFIFPLKNFRPLLDQLR | VEIVYPEGVDL | STMSVRKMTFPAQELDCSQVN |                  | 73 |
| GeneScaffold'2759 |                  | MTTQMRLLCFAAVTLLAEAQMI | PPFIFPLKNFRPLLDQLR | VEIVYPEGVDL | STMSVRKMTFPAQELDCSQVN |                  | 73 |

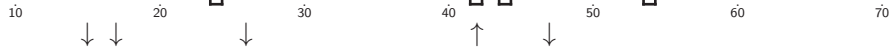

Exon 2

Exon 3

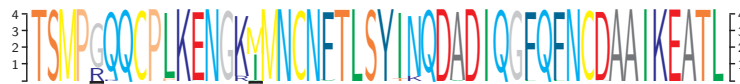

|                     |                                                |     |
|---------------------|------------------------------------------------|-----|
| 105746'1. Gmo. Gre  | TSMPGQQPLKENGKIMNENFTLSYIKQDADIQGFQFNDAAIKEATL | 121 |
| 103852'2. Gog. Gre  | TSMPGQQPLKENGKIMNENFTLSYIKQDADIQGFQFNDAAIKEATL | 121 |
| 152074'1. Gma. Pac  | TSMPGQQPLKENGKIMNENFTLSYIKQDADIQGFQFNDAAIKEATL | 121 |
| 152050'1. Gma. Pac  | TSMPGQQPLKENGKIMNENFTLSYIKQDADIQGFQFNDAAIKEATL | 121 |
| 152027'3. Gch. Pac  | TSMPGQQPLKENGKIMNENFTLSYINQDADIQGFQFNDAAIKEATL | 121 |
| 118507'6. Gmo. Ice  | TSMPGQQPLKENGKIMNENFTLSYINQDADIQGFQFNDAAIKEATL | 121 |
| 140272'9. Gmo. Bar  | TSMPGQQPLKENGKIMNENFTLSYINQDADIQGFQFNDAAIKEATL | 121 |
| 140179'3. Gmo. Cel  | TSMPGQQPLKENGKIMNENFTLSYINQDADIQGFQFNDAAIKEATL | 121 |
| 140254'2. Gmo. Bar  | TSMPRQQPLKENGKIMNENFTLSYINQDADIQGFQFNDAAIKEATL | 121 |
| 140179'1. Gmo. Cel  | TSMPRQQPLKENGKIMNENFTLSYINQDADIQGFQFNDAAIKEATL | 121 |
| 152018'3. Gch. Pac  | TSMPRQQPLKENGKIMNENFTLSYINQDADIQGFQFNDAAIKEATL | 121 |
| 140272'8. Gmo. Bar  | TSMPRQQPLKENGKIMNENFTLSYINQDADIQGFQFNDAAIKEATL | 121 |
| 140272'1. Gmo. Bar  | TSMPRQQPLKENGKIMNENFTLSYINQDADIQGFQFNDAAIKEATL | 121 |
| 118507'12. Gmo. Ice | TSMPRQQPLKENGKIMNENFTLSYINQDADIQGFQFNDAAIKEATL | 121 |
| 152027'2. Gch. Pac  | TSMPRQQPLKENGKIMNENFTLSYINQDADIQGFQFNDAAIKEATL | 121 |
| 104931'3. Gmo. Gre  | TSMPRQQPLKENGKIMNENFTLSYINQDADIQGFQFNDAAIKEATL | 121 |
| ES786338.1' cath2   | TSMPRQQPLKENGKIMNENFTLSYINQDADIQGFQFNDAAIKEATL | 121 |
| 103659'2. Bsa. Gre  | TSMPGQQPLKGNKIMNENVTLSYINQDADIQGFQFNDAAIKEATL  | 121 |
| 105746'3. Gmo. Gre  | TSMPGQQPLKENGKIMNENFTLSYINQDADIQGFQFNDAAIKEATL | 121 |
| 152074'3. Gma. Pac  | TSMPGQQPLKENGKIMNENFTLSYINQDADIQGFQFNDAAIKEATL | 121 |
| 104947'2. Gog. Gre  | TSMPGQQPLKENGKIMNENFTLSYINQDADIQGFQFNDAAIKEATL | 121 |
| 152050'3. Gma. Pac  | TSMPGQQPLKENGKIMNENFTLSYINQDADIQGFQFNDAAIKEATL | 121 |
| 152921'3. Gmo. Nor  | TSMPGQQPPKENGKIMNENFTLSYINQDADIQGFQFNDAAIKEATL | 121 |
| FG312333.1' cath1   | TSMPGQQPLKENGKIMNENFTLSYINQDADIQGFQFNDAAIKEATL | 121 |
| EY975127' cath1     | TSMPGQQPLKENGKIMNENFTLSYINQDADIQGFQFNDAAIKEATL | 121 |
| 152027'1. Gch. Pac  | TSMPGQQPLKENGKIMNENFTLSYINQDADIQGFQFNDAAIKEATL | 121 |
| GW862872.1-cath1    | TSMPGQQPLKENGKIMNENFTLSYINQDADIQGFQFNDAAIKEATL | 121 |
| 200079'3. Gmo. Can  | TSMPGQQPLKENGKIMNENFTLSYINQDADIQGFQFNDAAIKEATL | 121 |
| 117757'1. Gmo. Ice  | TSMPGQQPLKENGKIMNENFTLSYINQDADIQGLQFNDAAIKEATL | 121 |
| 104931'1. Gmo. Gre  | TSMPRQQPLKENGKIMNENFTLSYINQDADIQGFQFNDAAIKEATL | 121 |
| 118507'7. Gmo. Ice  | TSMPGQQPLKENGKIMNENFTLSYINQDADIQGFQFNDAAIKEATL | 121 |
| 200079'1. Gmo. Can  | TSMPGQQPPKENGKIMNENFTLSYINQDADIQGFQFNDAAIKEATL | 121 |
| 115574'2. Gmo. Far  | TSMPGQQPLKENGKIMNENFTLSYINQDADIQGFQFNDAAIKEATL | 121 |
| 140233'2. Gmo. Bal  | TSMPGQQPLKENGKIMNENFTLSYINQDADIQGFQFNDAAIKEATL | 121 |
| 140176'1. Gmo. Cel  | TSMPGQQPLKENGKIMNENFTLSYINQDADIQGFQFNDAAIKEATL | 121 |
| 104725'1. Bsa. Gre  | TSMPGQQPLKENGKIMNENFTLSYINQDADIQGFQFNDAAIKEATL | 121 |
| 114718'1. Gmo. Far  | TSMPGQQPLKENGKIMNENFTLSYINQDADIQGFQFNDAAIKEATL | 121 |
| 152924'3. Gmo. Nor  | TSMPGQQPLKENGKIMNENFTLSYINQDADIQGFQFNDAAIKEATL | 121 |
| 114718'4. Gmo. Far  | TSMPGQQPLKENGKIMNENFTLSYINQDADIQGFQFNDAAIKEATL | 121 |
| 125968'3. Gmo. Ice  | TSMPGQQPLKENGKIMNENFTLSYINQDADIQGFQFNDAAIKEATL | 121 |
| 115574'1. Gmo. Far  | TSMPGQQPLKENGKIMNENFTLSYINQDADIQGFQFNDAAIKEATL | 121 |
| 152924'2. Gmo. Nor  | TSMPGQQPLKENGKIMNENFTLSYINQDADIQGFQFNDAAIKEATL | 121 |
| 200093'5. Gmo. Can  | TSMPGQQPLKENGKIMNENFTLSYINQDADIQGFQFNDAAIKEATL | 121 |
| 117795'1. Gmo. Ice  | TSMPGQQPLKENGKIMNENFTLSYINQDADIQGFQFNDAAIKEATL | 121 |
| 118214'2. Gmo. Ice  | TSMPGQQPLKENGKIMNENFTLSYINQDADIQGFQFNDAAIKEATL | 121 |
| 140219'3. Gmo. Bal  | TSMPGQQPLKENGKIMNENFTLSYINQDADIQGFQFNDAAIKEATL | 121 |
| 200093'3. Gmo. Can  | TSMPGQQPLKENGKIMNENFTLSYINQDADIQGFQFNDAAIKEATL | 121 |
| EU707291.1' cath1   | TSMPGQQPLKENGKIMNENFTLSYINQDADIQGFQFNDAAIKEATL | 121 |
| GeneScaffold'2759   | TSMPGQQPLKENGKIMNENFTLSYINQDADIQGFQFNDAAIKEATL | 121 |

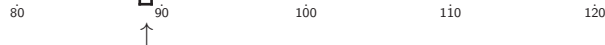

- Asp, Glu
- Arg, Lys, His
- Phe, Tyr, Trp
- Ala, Gly
- Cys, Met
- Ser, Thr
- Asn, Gln
- Leu, Val, Ile
- Pro
