# Supplementary material for: Trans-species polymorphism at antimicrobial innate immunity cathelicidin genes of Atlantic cod and related species
Source: PeerJ journal article supplement (doi:10.7717/peerj.976), 2015-05-21

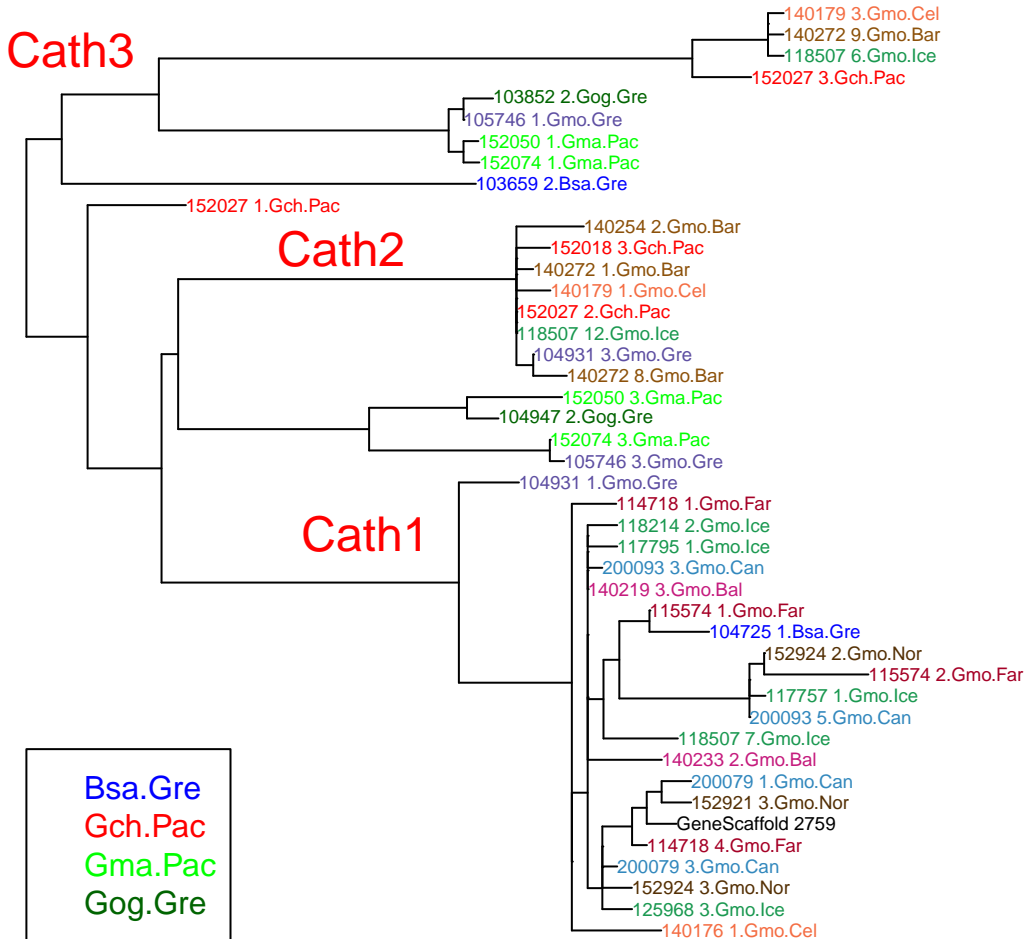

Supplement: FigS4.pdf [file FigS4.pdf]
