# Supplementary material for: Trans-species polymorphism at antimicrobial innate immunity cathelicidin genes of Atlantic cod and related species
Source: PubMed Central journal article supplement (PMC4451034; doi:10.7717/peerj.976), 2015-05-21
Supplement: peerj-03-976-s003.pdf [file peerj-03-976-s003.pdf]

Intron 3

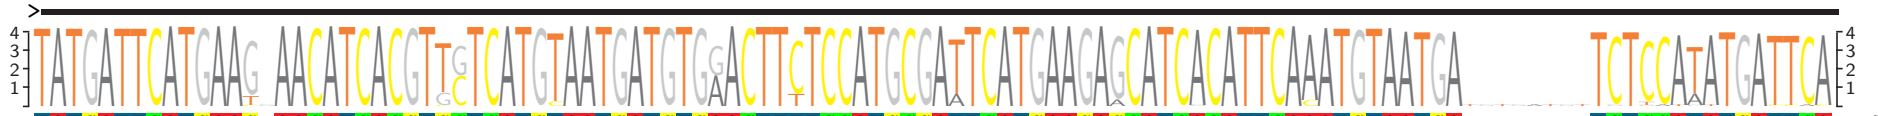

|                     |                                                                                                                       |     |
|---------------------|-----------------------------------------------------------------------------------------------------------------------|-----|
| 105746'1. Gmo. Gre  | TATGATTCATGAAG . AACATCAGGTGCTCATGTAATGATGTGAACTTTCCATGCGATTGAAAGAGCATCACATTCAAATGTAATGA . . . . . TCTCCATATGATTCA    | 771 |
| 103852'2. Gog. Gre  | TATGATTCATGAAG . AACATCAGGTGCTCATGTAATGATGTGAACTTTCCATGCGATTGAAAGAGCATCACATTCAAATGTAATGA . . . . . TCTCCATATGATTCA    | 771 |
| 152074'1. Gma. Pac  | . . . . . CATGAAG . AACATCAGGTGCTCATGTAATGATGTGAACTTTCCATGCGATTGAAAGAGCATCACATTCAAATGTAATGA . . . . . TCTCCATATGATTCA | 713 |
| 152050'1. Gma. Pac  | TATGATTCATGAAG . AACATCAGGTGCTCATGTAATGATGTGAACTTTCCATGCGATTGAAAGAGCATCACATTCAAATGTAATGA . . . . . TCTCCATATGATTCA    | 771 |
| 152027'3. Gch. Pac  | TATGATTCATGAAG . AACATCAGGTGCTCATGTAATGATGTGAACTTTCCATGCGATTGAAAGAGCATCACATTCAAATGTAATGA . . . . . TGTGATGTT . . CTAC | 758 |
| 118507'6. Gmo. Ice  | TATGATTCATGAAG . AACATCAGGTGCTCATGTAATGATGTGAACTTTCCATGCGATTGAAAGAACATCACATTCACATGTA . . . . .                        | 748 |
| 140272'9. Gmo. Bar  | TATGATTCATGAAG . AACATCAGGTGCTCATGTAATGATGTGAACTTTCCATGCGATTGAAAGAACATCACATTCACATGTA . . . . .                        | 748 |
| 140179'3. Gmo. Cel  | TATGATTCATGAAG . AACATCAGGTGCTCATGCAATGATGTGAACTTTCCATGCGATTGAAAGAACATCACATTCAC . . . . .                             | 743 |
| 140254'2. Gmo. Bar  | TATGATTCATGAAG . AACATCAGGTTCATCATGTAATGATGTGAACTTTCCATGCGAATCATGAAGAGCATCACATTCAAATGTAATGA . . . . . TCTCCAAATGATCCA | 771 |
| 140179'1. Gmo. Cel  | TATGATTCATGAAG . AACATCAGGTTCATCATGTAATGATGTGAACTTTCCATGCGAATCATGAAGAGCATCGCATTCAAATGTAATGA . . . . . TCTCCAAATGATTCA | 772 |
| 152018'3. Gch. Pac  | TATGATTCATGAAG . AACATCAGGTTCATCATGTAATGATGTGAACTTTCCATGCGAATCATGAAGAGCATCACATTCAAATGTAATGA . . . . . TCTCCAAATGATTCA | 769 |
| 140272'8. Gmo. Bar  | TATGATTCATGAAG . AACATCAGGTTCATCATGTAATGATGTGAACTTTCCATGCGAATCATGAAGAGCATCACATTCAAATGTAATGA . . . . . TCTCCAAATGATTCA | 774 |
| 104931'3. Gmo. Gre  | TATGATTCATGAAG . AACATCAGGTTCATCATGTAATGATGTGAACTTTCCATGCGAATCATGAAGAGCATCACATTCAAATGTAATGA . . . . . TCTCCAAATGATTCA | 771 |
| 140272'1. Gmo. Bar  | TATGATTCATGAAG . AACATCAGGTTCATCATGTAATGATGTGAACTTTCCATGCGAATCATGAAGAGCATCACATTCAAATGTAATGA . . . . . TCTCCAAATGATTCA | 771 |
| 118507'12. Gmo. Ice | TATGATTCATGAAG . AACATCAGGTTCATCATGTAATGATGTGAACTTTCCATGCGAATCATGAAGAGCATCACATTCAAATGTAATGA . . . . . TCTCCAAATGATTCA | 772 |
| 152027'2. Gch. Pac  | TATGATTCATGAAG . AACATCAGGTTCATCATGTAATGATGTGAACTTTCCATGCGAATCATGAAGAGCATCACATTCAAATGTAATGA . . . . . TCTCCAAATGATTCA | 773 |
| 103659'2. Bsa. Gre  | TATGATTCATGAAG . AACATCAGGTTCATCATGTAATGATGTGAACTTTCCATGCGAATCATGAAGAACATCACATTCACATGTAATGATGATGATGTTCTCCATATGATTCA   | 770 |
| 105746'3. Gmo. Gre  | TATGATTCATGAAG . AACATCAGGTTCATCATGCAATGATGTGAACTTTCCATGCGAATCATGAAGAGCATCACATTCAAATGTAATGA . . . . . TCTCCATATGATTCA | 772 |
| 152074'3. Gma. Pac  | TATGATTCATGAAG . AACATCAGGTTCATCATGCAATGATGTGAACTTTCCATGCGAATCATGAAGAGCATCACATTCAAATGTAATGA . . . . . TCTCCATATGATTCA | 772 |
| 104947'2. Gog. Gre  | TATGATTCATGAAG . AACATCAGGTTCATCATGTAATGATGTGAACTTTCCATGCGAATCATGAAGAGCATCACATTCAAATGTAATGA . . . . . TCTTCATATGATTCA | 765 |
| 152050'3. Gma. Pac  | TATGATTCATGAAG . AACATCAGGTTCATCATGTAATGATGTGAACTTTCCATGCGAATCATGAAGAGCATCACATTCAAATGTAATGA . . . . . TCTTCATATGATTCA | 772 |
| 152027'1. Gch. Pac  | TATGATTCATGAAG . AACATCAGGTTCATCATGTAATGATGTGAACTTTCCATGCGAATCATGAAGAGCATCACATTCAAATGTAATGA . . . . . TCTCCATATGATTCA | 768 |
| 104931'1. Gmo. Gre  | TATGATTCATGAAG . AACATCAGGTTCATCATGTAATGATGTGAACTTTCCATGCGAATCATGAAGAGCATCACATTCAAATGTAATGA . . . . . TCTCCATATGATTCA | 771 |
| GeneScaffold'2759   | TATGATTCATGAATGAAATCAGGTTCATCATGTAATGATGTGGACTTTCCATGCGAATCATGAAGAGCATCACATTCAAATGTAATGA . . . . . TCTCCATATGATTCA    | 769 |
| 152921'3. Gmo. Nor  | TATGATTCATGAAT . AACATCAGGTTCATCATGTAATGATGTGGACTTTCCATGCGAATCATGAAGAGCATCACATTCAAATGTAATGA . . . . . TCTCCATATGATTCA | 769 |
| 200079'1. Gmo. Can  | TATGATTCATGAAG . AACATCAGGTTCATCATGTAATGATGTGGACTTTCCATGCGAATCATGAAGAGCATCACATTCAAATGTAATGA . . . . . TCTCCATATGATTCA | 768 |
| 118507'7. Gmo. Ice  | TATGATTCATGAAG . AACATCAGGTTCATCATGTAATGATGTGGACTTTCCATGCGAATCATGAAGAGCATCACATTCAAATGTAATGA . . . . . TCTCCATATGATTCA | 769 |
| 140233'2. Gmo. Bal  | TATGATTCATGAAG . AACATCAGGTTCATCATGTAATGATGTGGACTTTCCATGCGAATCATGAAGAGCATCACATTCAAATGTAATGA . . . . . TCTCCATATGATTCA | 769 |
| 115574'2. Gmo. Far  | TATGATTCATGAAG . AACATCAGGTTCATCATGTAATGATGTGGACTTTCCATGCGAATCATGAAGAGCATCACATTCAAATGTAATGA . . . . . TCTCCATATGATTCA | 769 |
| 140176'1. Gmo. Cel  | TATGATTCATGAAG . AACATCAGGTTCATCATGTAATGATGTGGACTTTCCATGCGAATCATGAAGAGCATCACATTCAAATGTAATGA . . . . . TCTCCATATGATTCA | 768 |
| 104725'1. Bsa. Gre  | TATGATTCATGAAG . AACATCAGGTTCATCATGTAATGATGTGGACTTTCCATGCGAATCATGAAGAGCATCACATTCAAATGTAATGA . . . . . TCTCCATATGATTCA | 762 |
| 114718'1. Gmo. Far  | TATGATTCATGAAG . AACATCAGGTTCATCATGTAATGATGTGGACTTTCCATGCGAATCATGAAGAGCATCACATTCAAATGTAATGA . . . . . TCTCCATATGATTCA | 769 |
| 152924'3. Gmo. Nor  | TATGATTCATGAAT . AACATCAGGTTCATCATGTAATGATGTGGACTTTCCATGCGAATCATGAAGAGCATCACATTCAAATGTAATGA . . . . . TCTCCATATGATTCA | 770 |
| 125968'3. Gmo. Ice  | TATGATTCATGAAT . AACATCAGGTTCATCATGTAATGATGTGGACTTTCCATGCGAATCATGAAGAGCATCACATTCAAATGTAATGA . . . . . TCTCCATATGATTCA | 768 |
| 114718'4. Gmo. Far  | TATGATTCATGAAT . AACATCAGGTTCATCATGTAATGATGTGGACTTTCCATGCGAATCATGAAGAGCATCACATTCAAATGTAATGA . . . . . TCTCCATATGATTCA | 769 |
| 115574'1. Gmo. Far  | TATGATTCATGAAG . AACATCAGGTTCATCATGTAATGATGTGGACTTTCCATGCGAATCATGAAGAGCATCACATTCAAATGTAATGA . . . . . TCTCCATATGATTCA | 762 |
| 117757'1. Gmo. Ice  | TATGATTCATGAAG . AACATCAGGTTCATCATGTAATGATGTGGACTTTCCATGCGAATCATGAAGAGCATCACATTCAAATGTAATGA . . . . . TCTCCATATGATTCA | 769 |
| 152924'2. Gmo. Nor  | TATGATTCATGAAG . AACATCAGGTTCATCATGTAATGATGTGGACTTTCCATGCGAATCATGAAGAGCATCACATTCAAATGTAATGA . . . . . TCTCCATATGATTCA | 768 |
| 200093'5. Gmo. Can  | TATGATTCATGAAG . AACATCAGGTTCATCATGTAATGATGTGGACTTTCCATGCGAATCATGAAGAGCATCACATTCAAATGTAATGA . . . . . TCTCCATATGATTCA | 768 |
| 200079'3. Gmo. Can  | TATGATTCATGAAT . AACATCAGGTTCATCATGTAATGATGTGGACTTTCCATGCGAATCATGAAGAGCATCACATTCAAATGTAATGA . . . . . TCTCCATATGATTCA | 768 |
| 117795'1. Gmo. Ice  | TATGATTCATGAAG . AACATCAGGTTCATCATGTAATGATGTGGACTTTCCATGCGAATCATGAAGAGCATCACATTCAAATGTAATGA . . . . . TCTCCATATGATTCA | 769 |
| 118214'2. Gmo. Ice  | TATGATTCATGAAG . AACATCAGGTTCATCATGTAATGATGTGGACTTTCCATGCGAATCATGAAGAGCATCACATTCAAATGTAATGA . . . . . TCTCCATATGATTCA | 769 |
| 140219'3. Gmo. Bal  | TATGATTCATGAAG . AACATCAGGTTCATCATGTAATGATGTGGACTTTCCATGCGAATCATGAAGAGCATCACATTCAAATGTAATGA . . . . . TCTCCATATGATTCA | 769 |
| 200093'3. Gmo. Can  | TATGATTCATGAAG . AACATCAGGTTCATCATGTAATGATGTGGACTTTCCATGCGAATCATGAAGAGCATCACATTCAAATGTAATGA . . . . . TCTCCATATGATTCA | 769 |

660 670 680 690 700 710 720 730 740 750 760 770

Intron 3

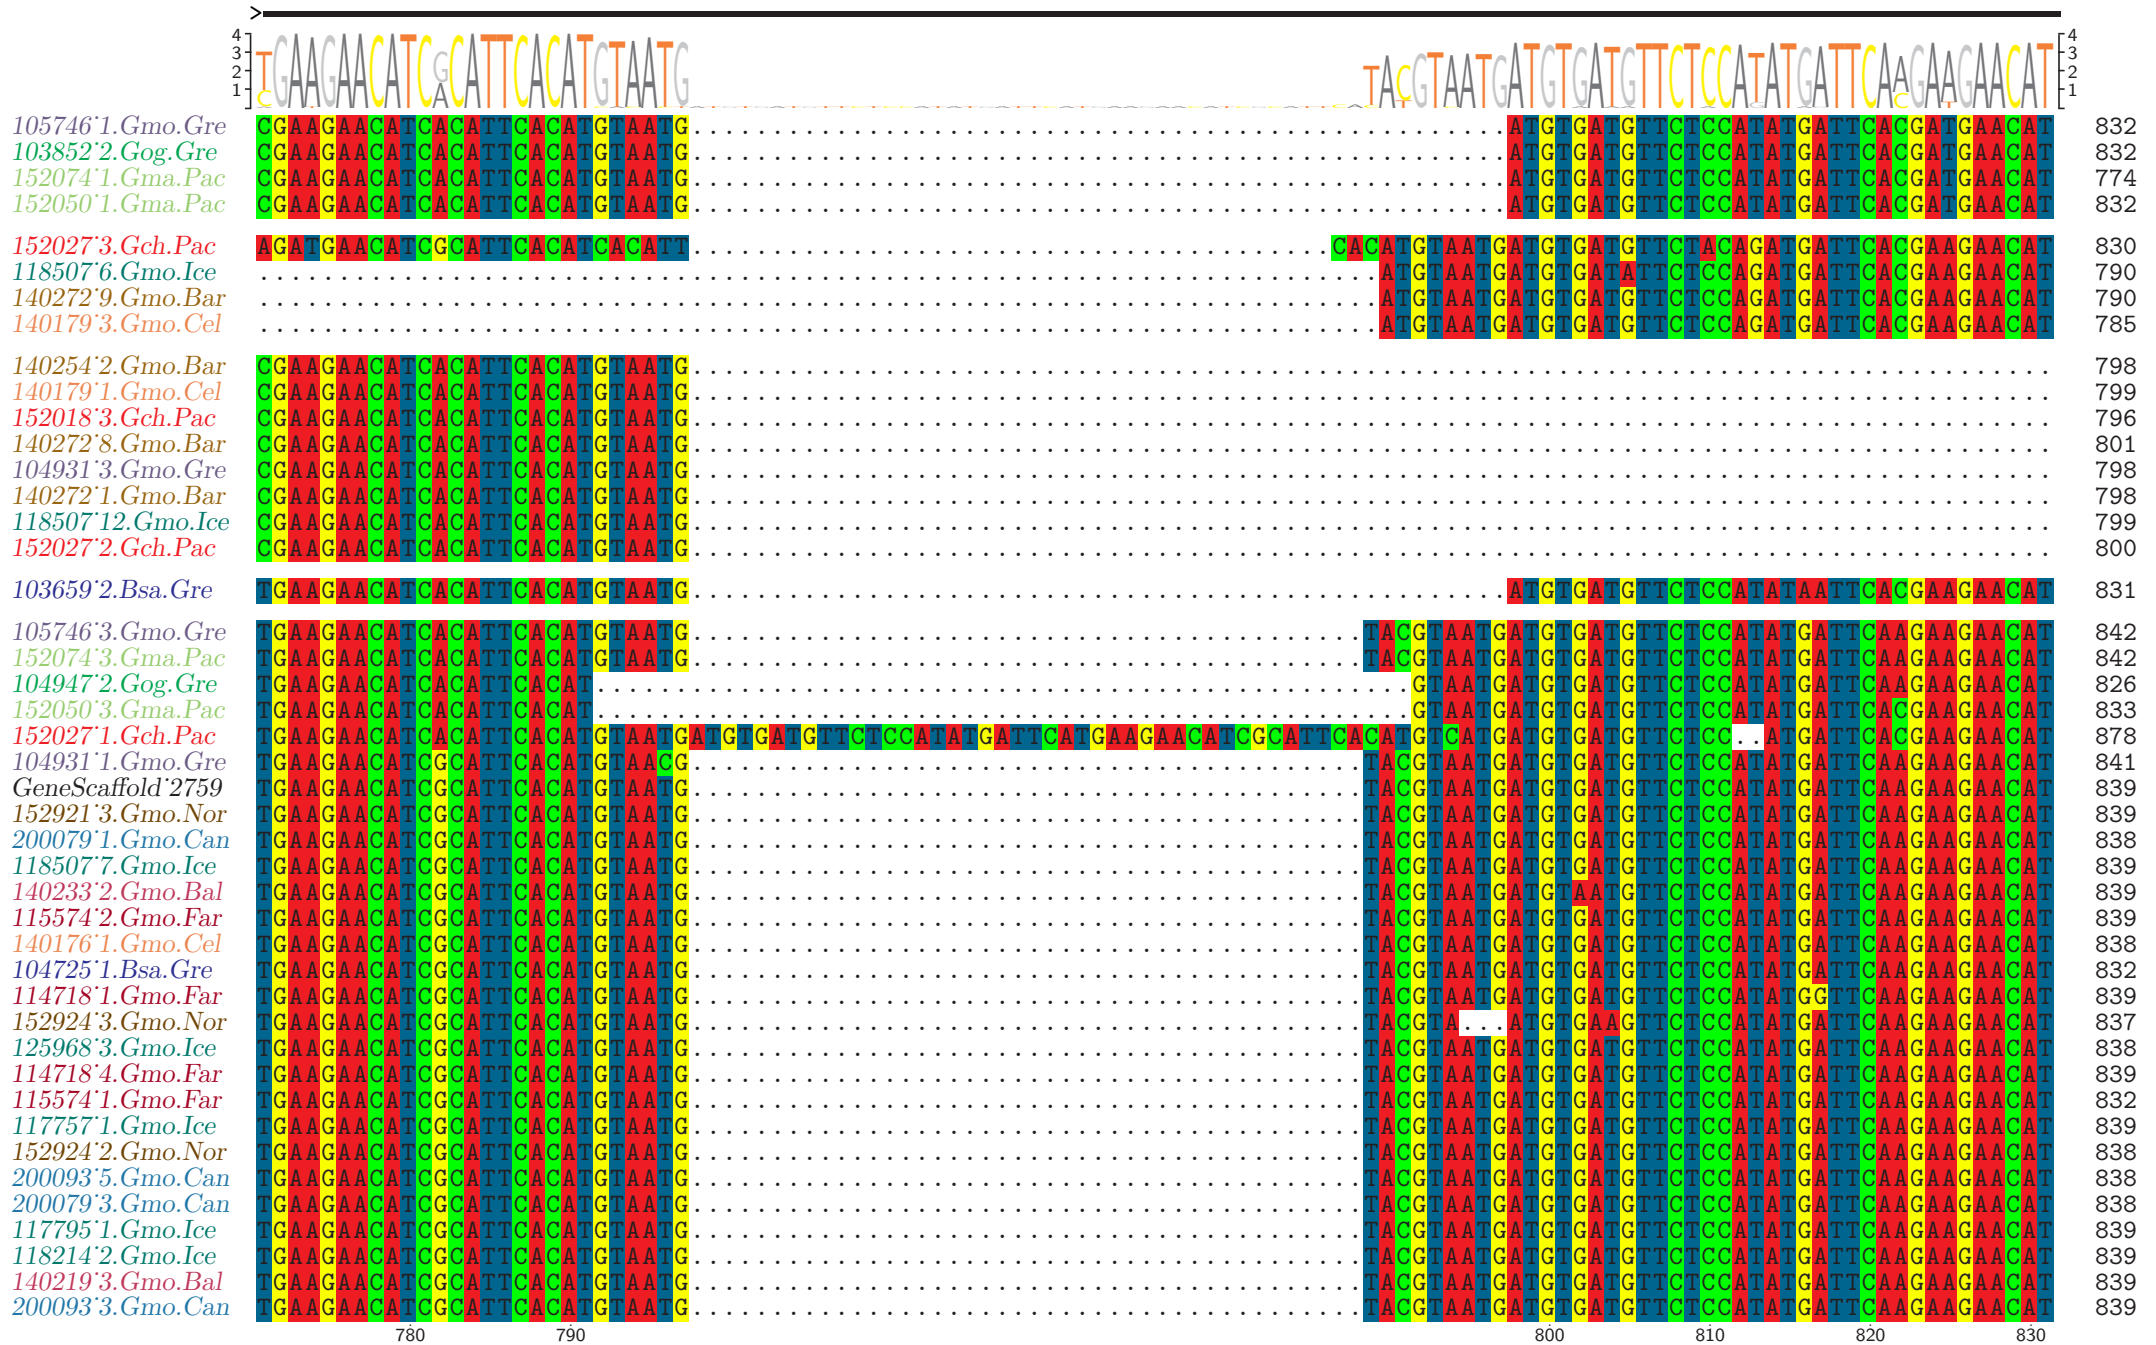



Intron 3

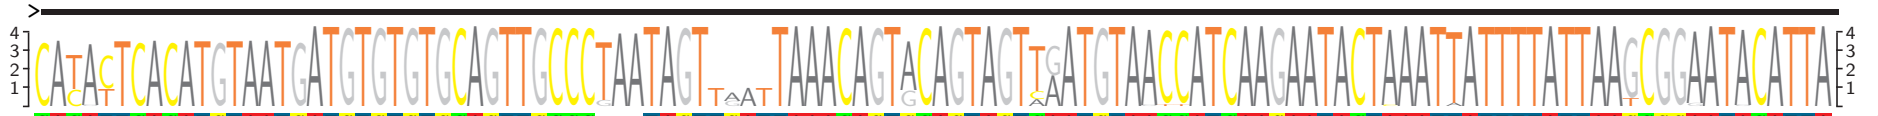

|                     |                                                                                                                        |     |
|---------------------|------------------------------------------------------------------------------------------------------------------------|-----|
| 105746'1. Gmo. Gre  | CACATTACATGTAATGATGTGTGTGCAGTTGCCCTAATAGT...TAGTTGATTAAACAGTGCAGTAGTCAATGTAACCATCAAGAATACTAAATTATTTTATTAAGCGGAATACATTA | 941 |
| 103852'2. Gog. Gre  | CACATTACATGTAATGATGTGTGTGCAGTTGCCCTAATAGT...TAGTTGATTAAACAGTGCAGTAGTCAATGTAACCATCAAGAATACTAAATTATTTTATTAAGCGGAATACATTA | 941 |
| 152074'1. Gma. Pac  | CACATTACATGTAATGATGTGTGTGCAGTTGCCCTAATAGT...TAGTTGATTAAACAGTGCAGTAGTCAATGTAACCATCAAGAATACTAAATTATTTTATTAAGCGGAATACATTA | 883 |
| 152050'1. Gma. Pac  | CACATTACATGTAATGATGTGTGTGCAGTTGCCCTAATAGT...TAGTTGATTAAACAGTGCAGTAGTCAATGTAACCATCAAGAATACTAAATTATTTTATTAAGCGGAATACATTA | 941 |
| 152027'3. Gch. Pac  | CACATTACATGTAATGATGTGTGTGCAGTTGCCCGAATAGTTAATTAACAGTGCAGTAGTAAATGTAACCATCAAGAATACTAAATTATTTTATTAAGCGGAATACATTA         | 942 |
| 118507'6. Gmo. Ice  | CACATTACATGTAATGATGTGTGTGCAGTTGCCCGAATAGTTAATTAACAGTGCAGTAGTAAATGTAACCATCAAGAATACTAAATTATTTTATTAAGCGGAATACATTA         | 902 |
| 140272'9. Gmo. Bar  | CACATTACATGTAATGATGTGTGTGCAGTTGCCCGAATAGTTAATTAACAGTGCAGTAGTAAATGTAACCATCAAGAATACTAAATTATTTTATTAAGCGGAATACATTA         | 902 |
| 140179'3. Gmo. Cel  | CACATTACATGTAATGATGTGTGTGCAGTTGCCCGAATAGTTAATTAACAGTGCAGTAGTAAATGTAACCATCAAGAATACTAAATTATTTTATTAAGCGGAATACATTA         | 897 |
| 140254'2. Gmo. Bar  | ...ATGTGTGTGCAGTTGCCCTAATAGT...TAAACAGTACAGTAGTTAATGTAACCATCAAGAATACTAAATTATTTTATTAAGCGGAATACATTA                      | 889 |
| 140179'1. Gmo. Cel  | ...ATGTGTGTGCAGTTGCCCTAATAGT...TAAACAGTACAGTAGTTAATGTAACCATCAAGAATACTAAATTATTTTATTAAGCGGAATACATTA                      | 890 |
| 152018'3. Gch. Pac  | ...ATGTGTGTGCAGTTGCCCTAATAGT...TAAACAGTACAGTAGTTAATGTAACCATCAAGAATACTAAATTATTTTATTAAGCGGAATACATTA                      | 887 |
| 140272'8. Gmo. Bar  | ...ATGTGTGTGCAGTTGCCCTAATAGT...TAAACAGTACAGTAGTTAATGTAACCATCAAGAATACTAAATTATTTTATTAAGCGGAATACATTA                      | 892 |
| 104931'3. Gmo. Gre  | ...ATGTGTGTGCAGTTGCCCTAATAGT...TAAACAGTACAGTAGTTAATGTAACCATCAAGAATACTAAATTATTTTATTAAGCGGAATACATTA                      | 889 |
| 140272'1. Gmo. Bar  | ...ATGTGTGTGCAGTTGCCCTAATAGT...TAAACAGTACAGTAGTTAATGTAACCATCAAGAATACTAAATTATTTTATTAAGCGGAATACATTA                      | 889 |
| 118507'12. Gmo. Ice | ...ATGTGTGTGCAGTTGCCCTAATAGT...TAAACAGTACAGTAGTTAATGTAACCATCAAGAATACTAAATTATTTTATTAAGCGGAATACATTA                      | 890 |
| 152027'2. Gch. Pac  | ...ATGTGTGTGCAGTTGCCCTAATAGT...TAAACAGTACAGTAGTTAATGTAACCATCAAGAATACTAAATTATTTTATTAAGCGGAATACATTA                      | 891 |
| 103659'2. Bsa. Gre  | CACATTACATGTAATGATGTGTGTGCAGTTGCCCTAATAGTTAATTAACAGTGCAGTAGTAAATGTAACCATCAAGAATACTAAATTATTTTATTAAGCGGAATACATTA         | 943 |
| 105746'3. Gmo. Gre  | CATACTCACATGTAATGATGTGTGTGCAGTTGCCCTAATAGT...TAAACAGTACAGTAGTTAATGTAACCATCAAGAATACTAAATAATTTTATTAAGCGGGATACATTA        | 950 |
| 152074'3. Gma. Pac  | CATACTCACATGTAATGATGTGTGTGCAGTTGCCCTAATAGT...TAAACAGTACAGTAGTTAATGTAACCATCAAGAATACTAAATAATTTTATTAAGCGGGATACATTA        | 950 |
| 104947'2. Gog. Gre  | CACATTCACATGTAATGATGTGTGTGCAGTTGCCCTAATAGT...TAAACAGTGCAGTAGTCAATGTAACCATCAAGAATACTAAATTATTTTATTAAGCGGAATACATTA        | 934 |
| 152050'3. Gma. Pac  | CACGTTTACATGTAATGATGTGTGTGCAGTTGCCCTAATAGT...TAAACAGTGCAGTAGTCAATGTAACCATCAAGAATACTAAATTATTTTATTAAGCGGAATACATTA        | 941 |
| 152027'1. Gch. Pac  | CACATTCACATGTAATGATGTGTGTGCAGTTGCCCTAATAGTTAATTAACAGTACAGTAGTTAATGTAACCATCAAGAATACTAAATTATTTTATTAAGCGGAATACATTA        | 990 |
| 104931'1. Gmo. Gre  | CATACTCACATGTAATGATGTGTGTGCAGTTGCCCTAATAGT...TAAACAGTACAGTAGTTGATGTAACCATCAAGAATACTAAATTATTTTATTAAGCGGAATACATTA        | 949 |
| GeneScaffold'2759   | CATACTCACATGTAATGATGTGTGTGCAGTTGCCCTAATAGT...TAAACAGTACAGTAGTTGATGTAACCATCAAGAATACTAAATTATTTTATTAATCGGAATACATTA        | 947 |
| 152921'3. Gmo. Nor  | CATACTCACATGTAATGATGTGTGTGCAGTTGCCCTAATAGT...TAAACAGTACAGTAGTTGATGTAACCATCAAGAATACTAAATTATTTTATTAATCGGAATACATTA        | 947 |
| 200079'1. Gmo. Can  | CATACTCACATGTAATGATGTGTGTGCAGTTGCCCTAATAGT...TAAACAGTACAGTAGTTGATGTAACCATCAAGAATACTAAATTATTTTATTAATCGGAATACATTA        | 946 |
| 118507'7. Gmo. Ice  | CATACTCACATGTAATGATGTGTGTGCAGTTGCCCTAATAGT...TAAACAGTACAGTAGTTGATGTAACCATCAAGAATACTAAATTATTTTATTAATCGGAATACATTA        | 947 |
| 140233'2. Gmo. Bal  | CATACTCACATGTAATGATGTGTGTGCAGTTGCCCTAATAGT...TAAACAGTACAGTAGTTGATGTAACCATCAAGAATACTAAATTATTTTATTAAGCGGAATACATTA        | 947 |
| 115574'2. Gmo. Far  | CATACTCACATGTAATGATGTGTGTGCAGTTGCCCTAATAGT...TAAACAGTACAGTAGTTGATGTAACCATCAAGAATACTAAATTATTTTATTAAGCGGAATACATTA        | 947 |
| 140176'1. Gmo. Cel  | CATACTCACATGTAATGATGTGTGTGCAGTTGCCCTAATAGT...TAAACAGTACAGTAGTTGATGTAACCATCAAGAATACTAAATTATTTTATTAAGCGGAATACATTA        | 946 |
| 104725'1. Bsa. Gre  | CATACTCACATGTAATGATGTGTGTGCAGTTGCCCTAATAGT...TAAACAGTACAGTAGTTGATGTAAGCCATCAAGAATACTAAATTATTTTATTAAGCGGAATACATTA       | 940 |
| 114718'1. Gmo. Far  | CATACTCACATGTAATGATGTGTGTGCAGTTGCCCTAATAGT...TAAACAGTACAGTAGTTGATGTAACCATCAAGAATACTAAATTATTTTATTAAGCGGAATACATTA        | 947 |
| 152924'3. Gmo. Nor  | CATACTCACATGTAATGATGTGTGTGCAGTTGCCCTAATAGT...TAAACAGTACAGTAGTTGATGTAACCATCAAGAATACTAAATTATTTTATTAAGCGGAATACATTA        | 945 |
| 125968'3. Gmo. Ice  | CATACTCACATGTAATGATGTGTGTGCAGTTGCCCTAATAGT...TAAACAGTACAGTAGTTGATGTAACCATCAAGAATACTAAATTATTTTATTAAGCGGAATACATTA        | 946 |
| 114718'4. Gmo. Far  | CATACTCACATGTAATGATGTGTGTGCAGTTGCCCTAATAGT...TAAACAGTACAGTAGTTGATGTAACCATCAAGAATACTCAATTATTTTATTAATCGGAATACATTA        | 947 |
| 115574'1. Gmo. Far  | CATACTCACATGTAATGATGTGTGTGCAGTTGCCCTAATAGT...TAAACAGTACAGTAGTTGATGTAACCATCAAGAATACTAAATTATTTTATTAAGCGGAATACATTA        | 940 |
| 117757'1. Gmo. Ice  | CATACTCACATGTAATGATGTGTGTGCAGTTGCCCTAATAGT...TAAACAGTACAGTAGTTGATGTAACCATCAAGAATACTAAATTATTTTATTAAGCGGAATACATTA        | 947 |
| 152924'2. Gmo. Nor  | CATACTCACATGTAATGATGTGTGTGCAGTTGCCCTAATAGT...TAAACAGTACAGTAGTTGATGTAACCATCAAGAATACTAAATTATTTTATTAAGCGGAATACATTA        | 946 |
| 200093'5. Gmo. Can  | CATACTCACATGTAATGATGTGTGTGCAGTTGCCCTAATAGT...TAAACAGTACAGTAGTTGATGTAACCATCAAGAATACTAAATTATTTTATTAAGCGGAATACATTA        | 946 |
| 200079'3. Gmo. Can  | CATACTCACATGTAATGATGTGTGTGCAGTTGCCCTAATAGT...TAAACAGTACAGTAGTTGATGTAACCATCAAGAATACTAAATTATTTTATTAAGCGGAATACATTA        | 946 |
| 117795'1. Gmo. Ice  | CATACTCACATGTAATGATGTGTGTGCAGTTGCCCTAATAGT...TAAACAGTACAGTAGTTGATGTAACCATCAAGAATACTAAATTATTTTATTAAGCGGAATACATTA        | 947 |
| 118214'2. Gmo. Ice  | CATACTCACATGTAATGATGTGTGTGCAGTTGCCCTAATAGT...TAAACAGTACAGTAGTTGATGTAATTATCAAGAATACTAAATTATTTTATTAAGCGGAATACATTA        | 947 |
| 140219'3. Gmo. Bal  | CATACTCACATGTAATGATGTGTGTGCAGTTGCCCTAATAGT...TAAACAGTACAGTAGTTGATGTAACCATCAAGAATACTAAATTATTTTATTAAGCGGAATACATTA        | 947 |
| 200093'3. Gmo. Can  | CATACTCACATGTAATGATGTGTGTGCAGTTGCCCTAATAGT...TAAACAGTACAGTAGTTGATGTAACCATCAAGAATACTAAATTATTTTATTAAGCGGAATACATTA        | 947 |

840 850 860 870 880 890 900 910 920 930 940



Intron 3

Exon 4

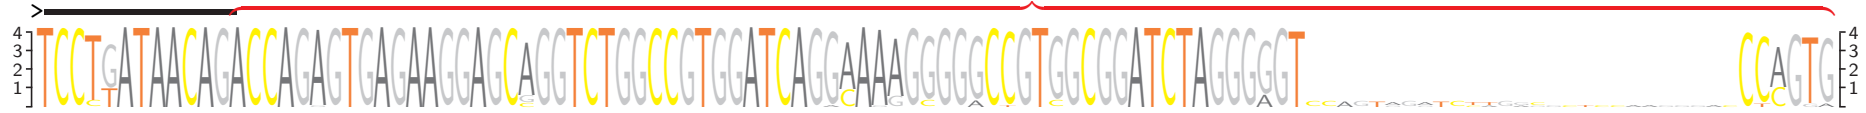

|                     |                                                                                                            |        |      |
|---------------------|------------------------------------------------------------------------------------------------------------|--------|------|
| 105746'1. Gmo. Gre  | TCCTTATAACAGACCAGAGTGAGAAGGAGCGGGTCTGGCCGTGGATCAGGAAAAGGGGGCCGTGGCGGATCTAGGGGGT                            | CCCGTG | 1138 |
| 103852'2. Gog. Gre  | TCCTTATAACAGACCAGAGTGAGAAGGAGCGGGTCTGGCCGTGGATCAGGAAAAGGGGGCCGTGGCGGATCTAGGGGGT                            | CCCGTG | 1138 |
| 152074'1. Gma. Pac  | TCCTTATAACAGACCAGAGTGAGAAGGAGCGGGTCTGGCCGTGGATCAGGAAAAGGGGGCCGTGGCGGATCTAGGGGGT                            | CCC    | 1077 |
| 152050'1. Gma. Pac  | TCCTTATAACAGACCAGAGTGAGAAGGAGCGGGTCTGGCCGTGGATCAGGAAAAGGGGGCCGTGGCGGATCTAGGGGGT                            | CCCGTG | 1138 |
| 152027'3. Gch. Pac  | TCCTGATAAACAGACCAGAGTGAGAAGGAGCAGGTCTGGCCGTGGATCAGGAAAAGGGGGCCGTGGCGGATCTAGGGGGT                           | CCAGTG | 1137 |
| 118507'6. Gmo. Ice  | TCCTGATAAACAGACCAGAGTGAGAAGGAGCAGGTCTGGCCGTGGATCAGGAAAAGGGGGCCGTGGCGGATCTAGGGGGT                           | CCAGTG | 1097 |
| 140272'9. Gmo. Bar  | TCCTGATAAACAGACCAGAGTGAGAAGGAGCAGGTCTGGCCGTGGATCAGGAAAAGGGGGCCGTGGCGGATCTAGGGGGT                           | CCAGTG | 1097 |
| 140179'3. Gmo. Cel  | TCCTGATAAACAGACCAGAGTGAGAAGGAGCAGGTCTGGCCGTGGATCAGGAAAAGGGGGCCGTGGCGGATCTAGGGGGT                           | CCAGTG | 1092 |
| 140254'2. Gmo. Bar  | TCCTTATAACAGACCAGAGTGAGAAGGAGCAGGTCTGGCCGTGGATCAGGCAAAGGGGGCCGTGGCGGATCTAGGGAGT                            | CCCGTG | 1086 |
| 140179'1. Gmo. Cel  | TCCTTATAACAGACCAGAGTGAGAAGGAGCAGGTCTGGCCGTGGATCAGGCAAAGGGGGCCGTGGCGGATCTAGGGAGT                            | CCCGTG | 1087 |
| 152018'3. Gch. Pac  | TCCTTATAACAGACCAGAGTGAGAAGGAGCAGGTCTGGCCGTGGATCAGGCAAAGGGGGCCGTGGCGGATCTAGGGAGT                            | CCCGTG | 1084 |
| 140272'8. Gmo. Bar  | TCCTTATAACAGACCAGAGTGAGAAGGAGCAGGTCTGGCCGTGGATCAGGCAAAGGGGGCCGTGGCGGATCTAGGGAGT                            | CCCGTG | 1089 |
| 104931'3. Gmo. Gre  | TCCTTATAACAGACCAGAGTGAGAAGGAGCAGGTCTGGCCGTGGATCAGGCAAAGGGGGCCGTGGCGGATCTAGGGAGT                            | CCCGTG | 1086 |
| 140272'1. Gmo. Bar  | TCCTTATAACAGACCAGGGTGAGAAGGAGCAGGTCTGGCCGTGGATCAGGCAAAGGGGGCCGTGGCGGATCTAGGGAGT                            | CCCGTG | 1086 |
| 118507'12. Gmo. Ice | TCCTTATAACAGACCAGAGTGAGAAGGAGCAGGTCTGGCCGTGGATCAGGCAAAGGGGGCCGTGGCGGATCTAGGGAGT                            | CCCGTG | 1087 |
| 152027'2. Gch. Pac  | TCCTTATAACAGACCAGAGTGAGAAGGAGCAGGTCTGGCCGTGGATCAGGCAAAGGGGGCCGTGGCGGATCTAGGGAGT                            | CCCGTG | 1088 |
| 103659'2. Bsa. Gre  | TCCTGATAAACAGACCAGAGTGAGAAGGAGCGGGTCTGGCCGTGGATCAGGAAAAGGGGGCTGTGGCGGATCTAGGGGGT                           | CCCGTG | 1138 |
| 105746'3. Gmo. Gre  | TCCTGATAAACAGACCAGAGTGAGAAGGAGCAGGTCTGGCCGTGGATCAGGCAAAGGGGGCCGTGGCGGATCTAGGGGGTCCAGTAGATCTTGGC            | CTAGGA | 1162 |
| 152074'3. Gma. Pac  | TCCTGATAAACAGACCAGAGTGAGAAGGAGCAGGTCTGGCCGTGGATCAGGCAAAGGGGGCCGTGGCGGATCTAGGGGGTCCAGTAGATCTTGGC            | CTAGGA | 1162 |
| 104947'2. Gog. Gre  | TCCTTATAACAGACCAGAGTGAGAAGGAGCAGGTCTGGCCGTGGATCAGGCAAAGGGGGCCGTGGCGGATCTAGGGGGT                            |        | 1124 |
| 152050'3. Gma. Pac  | TCCTGATAAACAGACCAGAGTGAGAAGGAGCAGGTCTGGCCGTGGATCAGGCAAAGGGGGCCGTGGCGGATCTAGGGGGT                           |        | 1131 |
| 152027'1. Gch. Pac  | TCCTGATAAACAGACCAGAGTGAGAAGGAGCAGGTCTGGCCGTGGATCAGGAAAAGGGGGCCGTGGCGGATCTAGGGGGT                           | CCCGTG | 1185 |
| 104931'1. Gmo. Gre  | TCCTGATAAACAGACCAGAGTGAGAAGGAGCCGGTCTGGCCGTGGATCAGGAAAAGGGGGCCGTGGCGGATCTAGGGGGT                           | CCAGTG | 1144 |
| GeneScaffold'2759   | TCCCGATAAACAGACCAGAGTGAGAAGGAGCAGGTCTGGCCGTGGATCAGGAAAAGGGGGCCGTGGCGGATCTAGGGGGT                           | CCAGTG | 1142 |
| 152921'3. Gmo. Nor  | TCCCGATAAACAGACCAGAGTGAGAAGGAGCAGGTCTGGCCGTGGATCAGAAAAGGGGGCCGTGGCGGATCTAGGGGGT                            | CCAGTG | 1142 |
| 200079'1. Gmo. Can  | TCCCGATAAACAGACCAGAGTGAGAAGGAGCAGGTCTGGCCGTGGATCAGGAAAAGGGGGCCGTGGCGGATCTAGGGGGT                           | CCAGTG | 1141 |
| 118507'7. Gmo. Ice  | TCCCGATAAACAGACCAGAGTGAGAAGGAGCAGGTCTGGCCGTGGATCAGGAAAAGGGGGCCGTGGCGGATCTAGGGGGT                           | CCAGTG | 1142 |
| 140233'2. Gmo. Bal  | TCCTGATAAACAGACCAGAGTGAGAAGGAGCAGGTCTGGCCGTGGATCAGGAAAAGGGGGCCGTGGCGGATCTAGGGGGT                           | CCAGTG | 1142 |
| 115574'2. Gmo. Far  | TCCTGATAAACAGACCAGAGTGAGAAGGAGCAGGTCTGGCCGTGGATCAGGAAAAGGGGGCCGTGGCGGATCTAGGGGGT                           | CCAGTG | 1142 |
| 140176'1. Gmo. Cel  | TCCTGATAAACAGACCAGAGTGAGAAGGAGCCGGTCTGGCCGTGGATCAGGAAAAGGGGGCCGTGGCGGATCTAGGGGGT                           | CCAGTG | 1141 |
| 104725'1. Bsa. Gre  | TCCTGATAAACAGACCAGAGTGAGAAGGAGCAGGTCTGGCCGTGGATCAGGAAAAGGGGGCCGTGGCGGATCTAGGGGGT                           | CCAGTG | 1135 |
| 114718'1. Gmo. Far  | TCCTGATAAACAGACCAGAGTGAGAAGGAGCCGGTCTGGCCGTGGATCAGGAAAAGGGGGCCGTGGCGGATCTAGGGGGT                           | CCAGTG | 1142 |
| 152924'3. Gmo. Nor  | TCCTGATAAACAGACCAGAGTGAGAAGGAGCAGGTCTGGCCGTGGATCAGGAAAAGGGGGCCGTGGCGGATCTAGGGGGT                           | CCAGTG | 1140 |
| 125968'3. Gmo. Ice  | TCCTGATAAACAGACCAGAGTGAGAAGGAGCAGGTCTGGCCGTGGATCAGGAAAAGGGGGCCGTGGCGGATCTAGGGGGT                           | CCAGTG | 1141 |
| 114718'4. Gmo. Far  | TCCTGATAAACAGACCAGAGTGAGAAGGAGCAGGTCTGGCCGTGGATCAGGAAAAGGGGGCCGTGGCGGATCTAGGGGGT                           | CCAGTG | 1142 |
| 115574'1. Gmo. Far  | TCCTGATAAACAGACCAGAGTGAGAAGGAGCAGGTCTGGCCGTGGATCAGGAAAAGGGGGCCGTGGCGGATCTAGGGGGT                           | CCAGTG | 1135 |
| 117757'1. Gmo. Ice  | TCCTGATAAACAGACCAGAGTGAGAAGGAGCAGGTCTGGCCGTGGATCAGGAAAAGGGGGCCGTGGCGGATCTAGGGGGTCCAGTGGGTCCAGAGGCTCCAAGGGA | CCAGTG | 1169 |
| 152924'2. Gmo. Nor  | TCCTGATAAACAGACCAGAGTGAGAAGGAGCAGGTCTGGCCGTGGATCAGGAAAAGGGGGCCGTGGCGGATCTAGGGGGT                           | CCAGTG | 1141 |
| 200093'5. Gmo. Can  | TCCTGATAAACAGACCAGAGTGAGAAGGAGCAGGTCTGGCCGTGGATCAGGAAAAGGGGGCCGTGGCGGATCTAGGGGGT                           | CCAGTG | 1141 |
| 200079'3. Gmo. Can  | TCCTGATAAACAGACCAGAGTGAGAAGGAGCAGGTCTGGCCGTGGATCAGGAAAAGGGGGCCGTGGCGGATCTAGGGGGT                           | CCAGTG | 1141 |
| 117795'1. Gmo. Ice  | TCCTGATAAACAGACCAGAGTGAGAAGGAGCAGGTCTGGCCGTGGATCAGGAAAAGGGGGCCGTGGCGGATCTAGGGGGT                           | CCAGTG | 1142 |
| 118214'2. Gmo. Ice  | TCCTGATAAACAGACCAGAGTGAGAAGGAGCAGGTCTGGCCGTGGATCAGGAAAAGGGGGCCGTGGCGGATCTAGGGGGT                           | CCAGTG | 1142 |
| 140219'3. Gmo. Bal  | TCCTGATAAACAGACCAGAGTGAGAAGGAGCAGGTCTGGCCGTGGATCAGGAAAAGGGGGCCGTGGCGGATCTAGGGGGT                           | CCAGTG | 1142 |
| 200093'3. Gmo. Can  | TCCTGATAAACAGACCAGAGTGAGAAGGAGCAGGTCTGGCCGTGGATCAGGAAAAGGGGGCCGTGGCGGATCTAGGGGGT                           | CCAGTG | 1142 |

1060 1070 1080 1090 1100 1110 1120 1130

Exon 4

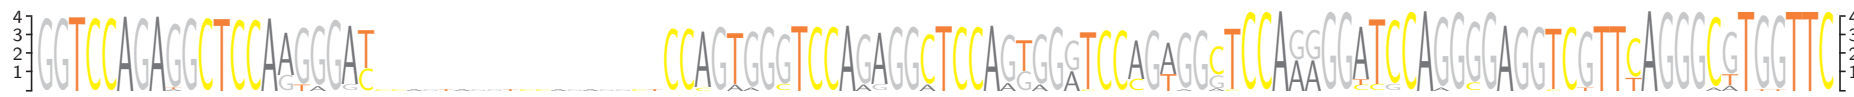

|                     |                        |                                                                 |              |      |
|---------------------|------------------------|-----------------------------------------------------------------|--------------|------|
| 105746'1. Gmo. Gre  | GGTCCAGAGGCTCCAAGAGAT  | CCAGTGGGTCCAGAGGCTCCAAGAGATCCCGTGGGTCCAGAGGCTCCAAGGGAGGTCGTTT   | AGGGCGTGGTTC | 1232 |
| 103852'2. Gog. Gre  | GGTCCAGAGGCTCCAAGAGAT  | CCAGTGGGTCCAGAGGCTCCAAGAGATCCCGTGGGTCCAGAGGCTCCAAGGGAGGTCGTTT   | AGGGCGTGGTTC | 1232 |
| 152074'1. Gma. Pac  | GGTCCAGAGGCTCCAAGAGAT  | CCAGTGGGTCCAGAGGCTCCAAGAGATCCCGTGGGTCCAGAGGCTCCAAGGGAGGTCGTTT   | AGGGCGTGGTTC | 1147 |
| 152050'1. Gma. Pac  | GGTCCAGAGGCTCCAAGAGAT  | CCAGTGGGTCCAGAGGCTCCAAGAGATCCCGTGGGTCCAGAGGCTCCAAGGGAGGTCGTTT   | AGGGCGTGGTTC | 1232 |
| 152027'3. Gch. Pac  | GGTCCAGAGGCTCCAAGGGAT  | CCAGTGGGTCCAGAGGCTCCAAGGGATCCCGTGGGTCCAGAGGTCGTCAGGGGAGGTCGTTT  | AGGGCATGGTTC | 1231 |
| 118507'6. Gmo. Ice  | GGTCCAGAGGCTCCAAGGGAT  | CCAGTGGGTCCAGAGGCTCCAAGGGATCCCGTGGGTCCAGAGGTCGTCAGGGGAGGTCGTTT  | AGGGCATGGTTC | 1191 |
| 140272'9. Gmo. Bar  | GGTCCAGAGGCTCCAAGGGAT  | CCAGTGGGTCCAGAGGCTCCAAGGGATCCCGTGGGTCCAGAGGTCGTCAGGGGAGGTCGTTT  | AGGGCATGGTTC | 1191 |
| 140179'3. Gmo. Cel  | GGTCCAGAGGCTCCAAGGGAT  | CCAGTGGGTCCAGAGGCTCCAAGGGATCCCGTGGGTCCAGAGGTCGTCAGGGGAGGTCGTTT  | AGGGCATGGTTC | 1186 |
| 140254'2. Gmo. Bar  | GGTCCAGAGGCTCCAAGGGGAT | CCAGAGGATCCAAGGGG                                               | AGGGCTTGGTTC | 1135 |
| 140179'1. Gmo. Cel  | GGTCCAGAGGCTCCAAGGGGAT | CCAGAGGATCCAAGGGG                                               | AGGGCTTGGTTC | 1127 |
| 152018'3. Gch. Pac  | GGTCCAGAGGCTCCAAGGGGAT | CCAGAGGATCCAAGGGG                                               | AGGGCTTGGTTC | 1133 |
| 140272'8. Gmo. Bar  | GGTCCAGAGGCTCCAAGGGGAT | CCAGAGGATCCAAGGGG                                               | AGGGCTTGGTTC | 1138 |
| 104931'3. Gmo. Gre  | GGTCCAGAGGCTCCAAGGGGAT | CCAGAGGATCCAAGGGG                                               | AGGGCTTGGTTC | 1135 |
| 140272'1. Gmo. Bar  | GGTCCAGAGGCTCCAAGGGGAT | CCAGAGGATCCAAGGGG                                               | AGGGCTTGGTTC | 1135 |
| 118507'12. Gmo. Ice | GGTCCAGAGGCTCCAAGGGGAT | CCAGAGGATCCAAGGGG                                               | AGGGCTTGGTTC | 1136 |
| 152027'2. Gch. Pac  | GGTCCAGAGGCTCCAAGGGGAT | CCAGAGGATCCAAGGGG                                               | AGGGCTTGGTTC | 1137 |
| 103659'2. Bsa. Gre  | GGTCCAGATGCTCCAAGGGAT  | CCAGTAGGTCCAGAGGCTCCAAGGGATCCAGTAGACCCAGAGGATCCAAGGGGAGGTCGTTT  | AGGGCTTTTTTC | 1232 |
| 105746'3. Gmo. Gre  | GGTCCAGAGGCTCCAAGGGGAT | CCAGTGGGTCCAGAGGCTCCAAGGGGATCCAGTGGGTCCAGAGGATCCAAGGGGAGGTCGTTT | AGGGCGTGGTTC | 1256 |
| 152074'3. Gma. Pac  | GGTCCAGAGGCTCCAAGGGGAT | CCAGTGGGTCCAGAGGCTCCAAGGGGATCCAGTGGGTCCAGAGGATCCAAGGGGAGGTCGTTT | AGGGCGTGGTTC | 1256 |
| 104947'2. Gog. Gre  | GGTCCAGAGGCTCCAAGGGGAT | CCCGTGGGTCCAGAGGCTCCAAGGGGATCCAGAGGATCCAAGGGGAGGTCGTTT          | AGGGAGTGGTTC | 1189 |
| 152050'3. Gma. Pac  | GGTCCAGAGGCTCCAAGGGGAT | CCCGTGGGTCCAGAGGCTCCAAGGGGATCCAGAGGATCCAAGGGGAGGTCGTTT          | AGGGAGTGGTTC | 1196 |
| 152027'1. Gch. Pac  | GGTCCAGAGGCTCCAAGGGGAT | CCAGTGGGTCCAGAGGCTCCAAGGGGATCCAGTGGATCCAGAGGATCCAAGGGGAGGTCGTTT | AGGGCGTGGTTC | 1279 |
| 104931'1. Gmo. Gre  | GGTCCAGAGGCTCCAAGGGGAC | CCAGTGGGTCCAGAGGCTCCAAGTGGGTCCAGAGGCTCCAAGGGATCCAAGGGGAGGTCGTTT | AGGGCGTGGTTC | 1238 |
| GeneScaffold'2759   | GGTCCAGAGGCTCCAAGGGGAC | CCAGTGGGTCCAGAGGCTCCAAGTGGGTCCAGAGGCTCCAAGGGATCCAAGGGGAGGTCGTTT | AGGGCGTGGTTC | 1236 |
| 152921'3. Gmo. Nor  | GGTCCAGAGGCTCCAAGGGGAC | CCAGTGGGTCCAGAGGCTCCAAGTGGGTCCAGAGGCTCCAAGGGATCCAAGGGGAGGTCGTTT | AGGGCGTGGTTC | 1236 |
| 200079'1. Gmo. Can  | GGTCCAGAGGCTCCAAGGGGAC | CCAGTGGGTCCAGAGGCTCCAAGTGGGTCCAGAGGCTCCAAGGGATCCAAGGGGAGGTCGTTT | AGGGCGTGGTTC | 1235 |
| 118507'7. Gmo. Ice  | GGTCCAGAGGCTCCAAGGGGAC | CCAGTGGGTCCAGAGGCTCCAAGTGGGTCCAGAGGCTCCAAGGGATCCAAGGGGAGGTCGTTT | AGGGCGTGGTTC | 1236 |
| 140233'2. Gmo. Bal  | GGTCCAGAGGCTCCAAGGGGAC | CCAGTGGGTCCAGAGGCTCCAAGTGGGTCCAGAGGCTCCAAGGGATCCAAGGGGAGGTCGTTT | AGGGCGTGGTTC | 1236 |
| 115574'2. Gmo. Far  | GGTCCAGAGGCTCCAAGGGGAC | CCAGTGGGTCCAGAGGCTCCAAGTGGGTCCAGAGGCTCCAAGGGATCCAAGGGGAGGTCGTTT | AGGGCGTGGTTC | 1236 |
| 140176'1. Gmo. Cel  | GGTCCAGAGGCTCCAAGGGGAC | CCAGTGGGTCCAGAGGCTCCAAGTGGGTCCAGAGGCTCCAAGGGATCCAAGGGGAGGTCGTTT | AGGGCGTGGTTC | 1235 |
| 104725'1. Bsa. Gre  | GGTCCAGAGGCTCCAAGGGGAT | CCAGTGGGTCCAGAGGCTCCAAGTGGGTCCAGAGGCTCCAAGGGATCCAAGGGGAGGTCGTTT | AGGGCGTGGTTC | 1229 |
| 114718'1. Gmo. Far  | GGTCCAGAGGCTCCAAGGGGAC | CCAGTGGGTCCAGAGGCTCCAAGTGGGTCCAGAGGCTCCAAGGGATCCAAGGGGAGGTCGTTT | AGGGCGTGGTTC | 1236 |
| 152924'2. Gmo. Nor  | GGTCCAGAGGCTCCAAGGGGAC | CCAGTGGGTCCAGAGGCTCCAAGTGGGTCCAGAGGCTCCAAGGGATCCAAGGGGAGGTCGTTT | AGGGCGTGGTTC | 1234 |
| 125968'3. Gmo. Ice  | GGTCCAGAGGCTCCAAGGGGAC | CCAGTGGGTCCAGAGGCTCCAAGTGGGTCCAGAGGCTCCAAGGGATCCAAGGGGAGGTCGTTT | AGGGCGTGGTTC | 1235 |
| 114718'4. Gmo. Far  | GGTCCAGAGGCTCCAAGGGGAC | CCAGTGGGTCCAGAGGCTCCAAGTGGGTCCAGAGGCTCCAAGGGATCCAAGGGGAGGTCGTTT | AGGGCGTGGTTC | 1254 |
| 115574'1. Gmo. Far  | GGTCCAGAGGCTCCAAGGGGAT | CCAGTGGGTCCAGAGGCTCCAAGTGGGTCCAGAGGCTCCAAGGGATCCAAGGGGAGGTCGTTT | AGGGCGTGGTTC | 1229 |
| 117757'1. Gmo. Ice  | GGTCCAGAGGCTCCAAGGGGAT | CCAGTGGGTCCAGAGGCTCCAAGTGGGTCCAGAGGCTCCAAGGGATCCAAGGGGAGGTCGTTT | AGGGCGTGGTTC | 1263 |
| 152924'2. Gmo. Nor  | GGTCCAGAGGCTCCAAGGGGAT | CCAGTGGGTCCAGAGGCTCCAAGTGGGTCCAGAGGCTCCAAGGGATCCAAGGGGAGGTCGTTT | AGGGCGTGGTTC | 1235 |
| 200093'5. Gmo. Can  | GGTCCAGAGGCTCCAAGGGGAT | CCAGTGGGTCCAGAGGCTCCAAGTGGGTCCAGAGGCTCCAAGGGATCCAAGGGGAGGTCGTTT | AGGGCGTGGTTC | 1235 |
| 200079'3. Gmo. Can  | GGTCCAGAGGCTCCAAGGGGAC | CCAGTGGGTCCAGAGGCTCCAAGTGGGTCCAGAGGCTCCAAGGGATCCAAGGGGAGGTCGTTT | AGGGCGTGGTTC | 1235 |
| 117795'1. Gmo. Ice  | GGTCCAGAGGCTCCAAGGGGAC | CCAGTGGGTCCAGAGGCTCCAAGTGGGTCCAGAGGCTCCAAGGGATCCAAGGGGAGGTCGTTT | AGGGCGTGGTTC | 1236 |
| 118214'2. Gmo. Ice  | GGTCCAGAGGCTCCAAGGGGAC | CCAGTGGGTCCAGAGGCTCCAAGTGGGTCCAGAGGCTCCAAGGGATCCAAGGGGAGGTCGTTT | AGGGCGTGGTTC | 1236 |
| 140219'3. Gmo. Bal  | GGTCCAGAGGCTCCAAGGGGAC | CCAGTGGGTCCAGAGGCTCCAAGTGGGTCCAGAGGCTCCAAGGGATCCAAGGGGAGGTCGTTT | AGGGCGTGGTTC | 1236 |
| 200093'3. Gmo. Can  | GGTCCAGAGGCTCCAAGGGGAC | CCAGTGGGTCCAGAGGCTCCAAGTGGGTCCAGAGGCTCCAAGGGATCCAAGGGGAGGTCGTTT | AGGGCGTGGTTC | 1236 |

1140 1150 1160 1170 1180 1190 1200 1210 1220 1230

Exon 4

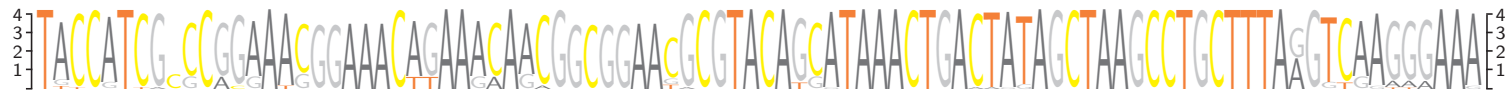

|                     |                                                                                                         |      |
|---------------------|---------------------------------------------------------------------------------------------------------|------|
| 105746'1. Gmo. Gre  | TGCCATCGCCCGGGAAAGGGAAA CAGAAACAGCGGCGGAAAGGCGTACATCATAAACTGACTATAGCTAAGCCTGCTTTAAGTCAAGGGAAA           | 1322 |
| 103852'2. Gog. Gre  | TGCCATCGCCCGGGAAAGGGAAA CAGAAACAGCGGCGGAAAGGCGTACATCATAAACTGACTATAGCTAAGCCTGCTTTAAGTCAAGGGAAA           | 1322 |
| 152074'1. Gma. Pac  | TGCCATCGCCCGGGAAAGGGAAA CAGAAACAGCGGCGGAAAGGCGTACATCATAAACTGACTATAGCTAAGCCTGCTTTAAGTCAAGGGAAA           | 1237 |
| 152050'1. Gma. Pac  | TGCCATCGCCCGGGAAAGGGAAA CAGAAACAGCGGCGGAAAGGCGTACATCATAAACTGACTATAGCTAAGCCTGCTTTAAGTCAAGGGAAA           | 1322 |
| 152027'3. Gch. Pac  | TACCGTGC CCGGGAAAGGGAAA CAGAAACAGCGGCGGAAAGGCGTACAGCATAAACTGACTATAGCTAAGCCTGCTTTAAGTCAAGGGAAA           | 1321 |
| 118507'6. Gmo. Ice  | TACCGTGC CCGGGAAAGGGAAA CAGAAACAGCGGCGGAAAGGCGTACAGCATAAACTGACTATAGCTAAGCCTGCTTTAAGTCAAGGGAAA           | 1281 |
| 140272'9. Gmo. Bar  | TACCGTGC CCGGGAAAGGGAAA CAGAAACAGCGGCGGAAAGGCGTACAGCATAAACTGACTATAGCTAAGCCTGCTTTAAGTCAAGGGAAA           | 1281 |
| 140179'3. Gmo. Cel  | TACCGTGC CCGGGAAAGGGAAA CAGAAACAGCGGCGGAAAGGCGTACAGCATAAACTGACTATAGCTAAGCCTGCTTTAAGTCAAGGGAAA           | 1276 |
| 140254'2. Gmo. Bar  | TACCATCA . GCAGAAAC . . . . . CTTAAGAAAACG . . . . . GCGTACAGGATAAACTGACTATAGCTAAGCCTGCTTTAAGTCAAGGGAAA | 1212 |
| 140179'1. Gmo. Cel  | TACCATCG . GCAGAAAC . . . . . CTTAAGAAAACG . . . . . GCGTACAGGATAAACTGACTATAGCTAAGCCTGCTTTAAGTCAAGGGAAA | 1204 |
| 152018'3. Gch. Pac  | TACCATCG . GCAGAAAC . . . . . CTTAAGAAAACG . . . . . GCGTACAGGATAAACTGACTATAGCTAAGCCTGCTTTAAGTCAAGGGAAA | 1210 |
| 140272'8. Gmo. Bar  | TACCATCG . GCAGAAAC . . . . . CTTAAGAAAACG . . . . . GCGTACAGGATAAACTGACTATAGCTAAGCCTGCTTTAAGTCAAGGGAAA | 1215 |
| 104931'3. Gmo. Gre  | TACCATCG . GCAGAAAC . . . . . CTTAAGAAAACG . . . . . GCGTACAGGATAAACTGACTATAGCTAAGCCTGCTTTAAGTCAAGGGAAA | 1212 |
| 140272'1. Gmo. Bar  | TACCATCG . GCAGAAAC . . . . . CTTAAGAAAACG . . . . . GCGTACAGGATAAACTGACTATAGCTAAGCCTGCTTTAAGTCAAGGGAAA | 1212 |
| 118507'12. Gmo. Ice | TACCATCG . GCAGAAAC . . . . . CTTAAGAAAACG . . . . . GCGTACAGGATAAACTGACTATAGCTAAGCCTGCTTTAAGTCAAGGGAAA | 1213 |
| 152027'2. Gch. Pac  | TACCATCG . GCAGAAAC . . . . . CTTAAGAAAACG . . . . . GCGTACAGGATAAACTGACTATAGCTAAGCCTGCTTTAAGTCAAGGGAAA | 1214 |
| 103659'2. Bsa. Gre  | TATCATCG . CCGCAAAGGGAAA CAGAAACAAACGGCGGAAACAGTACAGCATAAACTGACTATAGCTAAGCCTGCTTTAAGTCAAGGGAAA          | 1321 |
| 105746'3. Gmo. Gre  | TTCCATCG . CCGGAATCGGAAA CAGAAACAGCGGCGGAAAGGCGTACAGCATAAACTGACTATAGCTAAGCCTGCTTTAAGTCAAGGGAAA          | 1345 |
| 152074'3. Gma. Pac  | TTCCATCG . CCGGAATCGGAAA CAGAAACAGCGGCGGAAAGGCGTACAGCATAAACTGACTATAGCTAAGCCTGCTTTAAGTCAAGGGAAA          | 1345 |
| 104947'2. Gog. Gre  | TACCATCG . CCGGAAAACGGAAA CAGAAACAAAGGCGGAAAGGCGTACAGCATAAACTGACTATAGCTAAGCCTGCTTTAAGTCAAGGGAAA         | 1278 |
| 152050'3. Gma. Pac  | TACCATCG . CCGGAAAACGGAAA CAGAAACAAAGGCGGAAAGGCGTACAGCATAAACTGACTATAGCTAAGCCTGCTTTAAGTCAAGGGAAA         | 1285 |
| 152027'1. Gch. Pac  | TACCATCG . CCGGAAAACGGAAA CAGAAACAAAGGCGGAAAGGCGTACAGCATAAACTGACTATAGCTAAGCCTGCTTTAAGTCAAGGGAAA         | 1368 |
| 104931'1. Gmo. Gre  | TACCATCG . CCGGAAAACGGAAA CAGAAACAAAGGCGGAAAGGCGTACAGCATAAACTGACTATAGCTAAGCCTGCTTTAAGTCAAGGGAAA         | 1327 |
| GeneScaffold'2759   | TACCATCG . CCGGAAAACGGAAA CAGAAACAAAGGCGGAAAGGCGTACAGCATAAACTGACTATAGCTAAGCCTGCTTTAAGTCAAGGGAAA         | 1325 |
| 152921'3. Gmo. Nor  | TACCATCG . CCGGAAAACGGAAA CAGAAACAAAGGCGGAAAGGCGTACAGCATAAACTGACTATAGCTAAGCCTGCTTTAAGTCAAGGGAAA         | 1325 |
| 200079'1. Gmo. Can  | TACCATCG . CCGGAAAACGGAAA CAGAAACAAAGGCGGAAAGGCGTACAGCATAAACTGACTATAGCTAAGCCTGCTTTAAGTCAAGGGAAA         | 1324 |
| 118507'7. Gmo. Ice  | TACCATCG . CCGGAAAACGGAAA CAGAAACAAAGGCGGAAAGGCGTACAGCATAAACTGACTATAGCTAAGCCTGCTTTAAGTCAAGGGAAA         | 1325 |
| 140233'2. Gmo. Bal  | TACCATCG . CCGGAAAACGGAAA CAGAAACAAAGGCGGAAAGGCGTACAGCATAAACTGACTATAGCTAAGCCTGCTTTAAGTCAAGGGAAA         | 1325 |
| 115574'2. Gmo. Far  | TACCATCG . CCGGAAAACGGAAA CAGAAACAAAGGCGGAAAGGCGTACAGCGTAAACTGACTATAGCTAAGCCTGCTTTAAGTCAAGGGAAA         | 1325 |
| 140176'1. Gmo. Cel  | TACCATCG . CCGGAAAACGGAAA CAGAAACAAAGGCGGAAAGGCGTACAGCATAAACTGAAAGTAGCTAAGCCTGCTTTAAGTCAAGGGAAA         | 1324 |
| 104725'1. Bsa. Gre  | TACCATCG . CCGGAAAACGGAAA CAGAAACAAAGGCGGAAAGGCGTACAGCATAAACTGACTATAGCTAAGCCTGCTTTAAGTCAAGGGAAA         | 1318 |
| 114718'1. Gmo. Far  | TACCATCG . CCGGAAAACGGAAA CAGAAACAAAGGCGGAAAGGCGTACAGCATAAACTGACTATAGCTAAGCCTGCTTTAAGTCAAGGGAAA         | 1325 |
| 152924'3. Gmo. Nor  | TACCATCG . CCGGAAAACGGAAA CAGAAACAAAGGCGGAAAGGCGTACAGCATAAACTGACTATAGCTAAGCCTGCTTTAAGTCAAGGGAAA         | 1323 |
| 125968'3. Gmo. Ice  | TACCATCG . CCGGAAAACGGAAA CAGAAACAAAGGCGGAAAGGCGTACAGCATAAACTGACTATAGCTAAGCCTGCTTTAAGTCAAGGGAAA         | 1324 |
| 114718'4. Gmo. Far  | TACCATCG . CCGGAAAACGGAAA CAGAAACAAAGGCGGAAAGGCGTACAGCATAAACTGACTATAGCTAAGCCTGCTTTAAGTCAAGGGAAA         | 1343 |
| 115574'1. Gmo. Far  | TACCATCG . CCGGAAAACGGAAA CAGAAACAAAGGCGGAAAGGCGTACAGCATAAACTGACTATAGCTAAGCCTGCTTTAAGTCAAGGGAAA         | 1318 |
| 117757'1. Gmo. Ice  | TACCATCG . CCGGAAAACGGAAA CAGAAACAAAGGCGGAAAGGCGTACAGCATAAACTGACTATAGCTAAGCCTGCTTTAAGTCAAGGGAAA         | 1352 |
| 152924'2. Gmo. Nor  | TACCATCG . CCGGAAAACGGAAA CAGAAACAAAGGCGGAAAGGCGTACAGCATAAACTGACTATAGCTAAGCCTGCTTTAAGTCAAGGGAAAG        | 1324 |
| 200093'5. Gmo. Can  | TACCATCG . CCGGAAAACGGAAA CAGAAACAAAGGCGGAAAGGCGTACAGCATAAACTGACTATAGCTAAGCCTGCTTTAAGTCAAGGGAAA         | 1324 |
| 200079'3. Gmo. Can  | TACCATCG . CCGGAAAACGGAAA CAGAAACAAAGGCGGAAAGGCGTACAGCATAAACTGACTATAGCTAAGCCTGCTTTAAGTCAAGGGAAA         | 1324 |
| 117795'1. Gmo. Ice  | TACCATCG . CCGGAAAACGGAAA CAGAAACAAAGGCGGAAAGGCGTACAGCATAAACTGACTATAGCTAAGCCTGCTTTAAGTCAAGGGAAA         | 1325 |
| 118214'2. Gmo. Ice  | TACCATCG . CCGGAAAACGGAAA CAGAAACAAAGGCGGAAAGGCGTACAGCATAAACTGACTATAGCTAAGCCTGCTTTAAGTCAAGGGAAA         | 1325 |
| 140219'3. Gmo. Bal  | TACCATCG . CCGGAAAACGGAAA CAGAAACAAAGGCGGAAAGGCGTACAGCATAAACTGACTATAGCTAAGCCTGCTTTAAGTCAAGGGAAA         | 1325 |
| 200093'3. Gmo. Can  | TACCATCG . CCGGAAAACGGAAA CAGAAACAAAGGCGGAAAGGCGTACAGCATAAACTGACTATAGCTAAGCCTGCTTTAAGTCAAGGGAAA         | 1325 |

1240 1250 1260 1270 1280 1290 1300 1310 1320
