# Supplementary material for: Trans-species polymorphism at antimicrobial innate immunity cathelicidin genes of Atlantic cod and related species
Source: PubMed Central journal article supplement (PMC4451034; doi:10.7717/peerj.976), 2015-05-21

Pi and Theta Cath 3

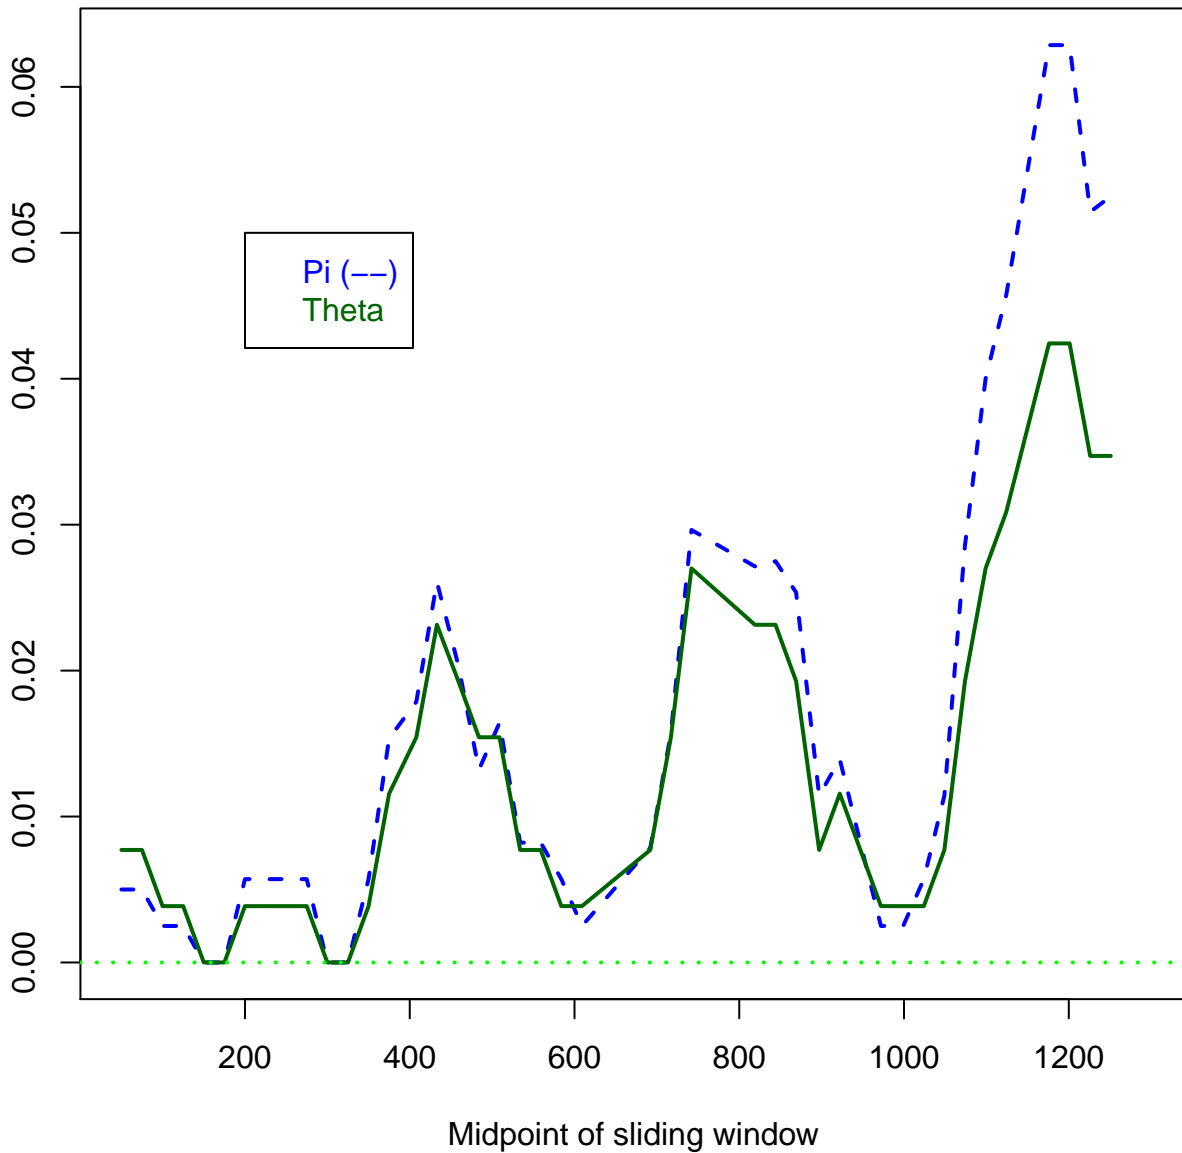

Supplement: peerj-03-976-s008.pdf [file peerj-03-976-s008.pdf]
